# Supplementary material for: Rainforest-like Atmospheric Chemistry in a Polluted Megacity
Source: Copernicus journal article supplement (doi:10.5194/acp-2020-35), 2020-02-13
Supplement: Supplementary file 1 [file acp-2020-35-supplement.pdf]

# 1 Rainforest-like atmospheric chemistry in a polluted megacity

2

## 3 **Supplementary Info.**

4

5

### 6 **Filtering data for mean diurnal plots – Figure 2**

7

8 Diurnal plots of inorganic and organic species are shown in Figure 2 of the main manuscript  
9 for ‘typical’ chemistry days, i.e. where ozone increases through the morning to an afternoon  
10 peak of > 70 ppb. This accounts for 25 of the total 34 days for which ozone measurements are  
11 available. The days removed from the analysis were 22/5, 29/5, 2/6, 6/6, 8/6, 10/6, 22/6,  
12 23/6, 24/6. Figure S1 shows the diurnal profiles of NO and O<sub>3</sub> for two atypical days (22/5, 2/6),  
13 compared to the mean diurnal cycle calculated from the 25 ‘typical’ high ozone days. On these  
14 atypical days, ozone is much lower throughout the day. Ozone mixing ratios are expected to  
15 be largely driven by transport of highly chemically processed regional air masses across the  
16 densely populated areas to the south of Beijing. Beijing air quality is significantly influenced  
17 by air-masses that have passed over regions with large cities and inhabited by more than 500  
18 million people (Parrish et al., 2016). The ‘atypical’, low-ozone days occur when the city is  
19 receiving cleaner air masses from the north of Beijing. The lower ozone leads to much higher  
20 concentrations of NO during the afternoon than on high ozone days. Figure S2 shows the  
21 ozone time series for the whole campaign. Figures S3 shows NO measurements for the whole  
22 campaign by hour for the afternoon hours of 12:00 to 20:00.

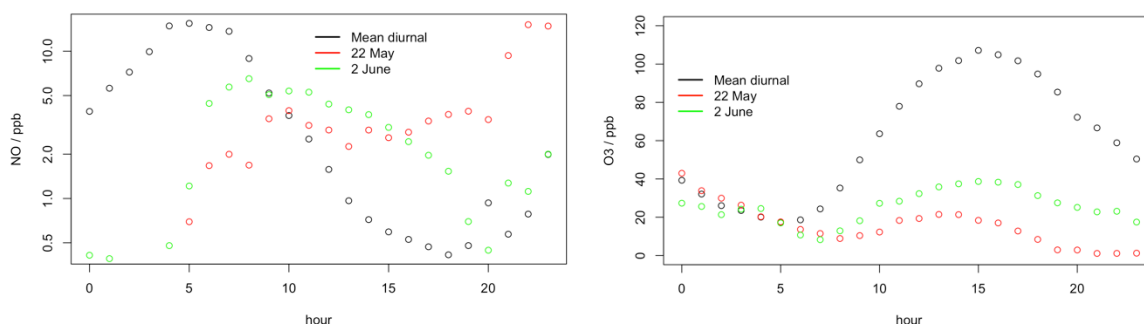

23

24 **Figure S1** Comparison of mean diurnal cycle of NO and O<sub>3</sub> during typical high ozone days with the atypical days 22 May and  
25 2 June. The full time series have been filtered for days with afternoon ozone peaks < 70 ppb.

26

27

28

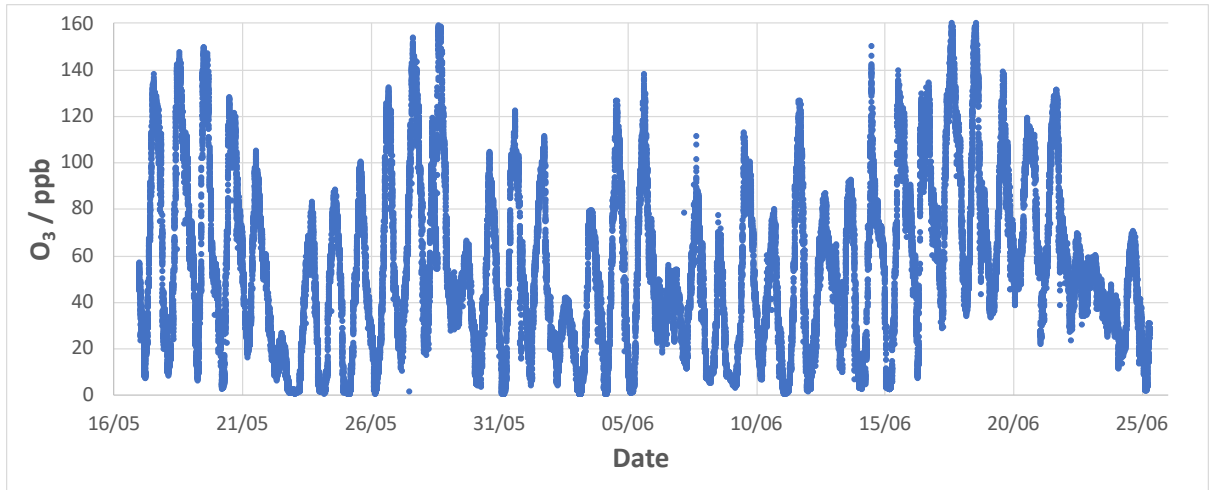

29  
30

Figure S2 Ozone time series for the campaign. 17 May – 25 June.

31  
32  
33  
34  
35  
36  
37  
38  
39  
40  
41  
42  
43  
44  
45  
46  
47  
48  
49  
50  
51  
52  
53  
54  
55  
56  
57  
58  
59  
60  
61

62 **Quantification of hourly [NO] decrease observed in the afternoon**

63

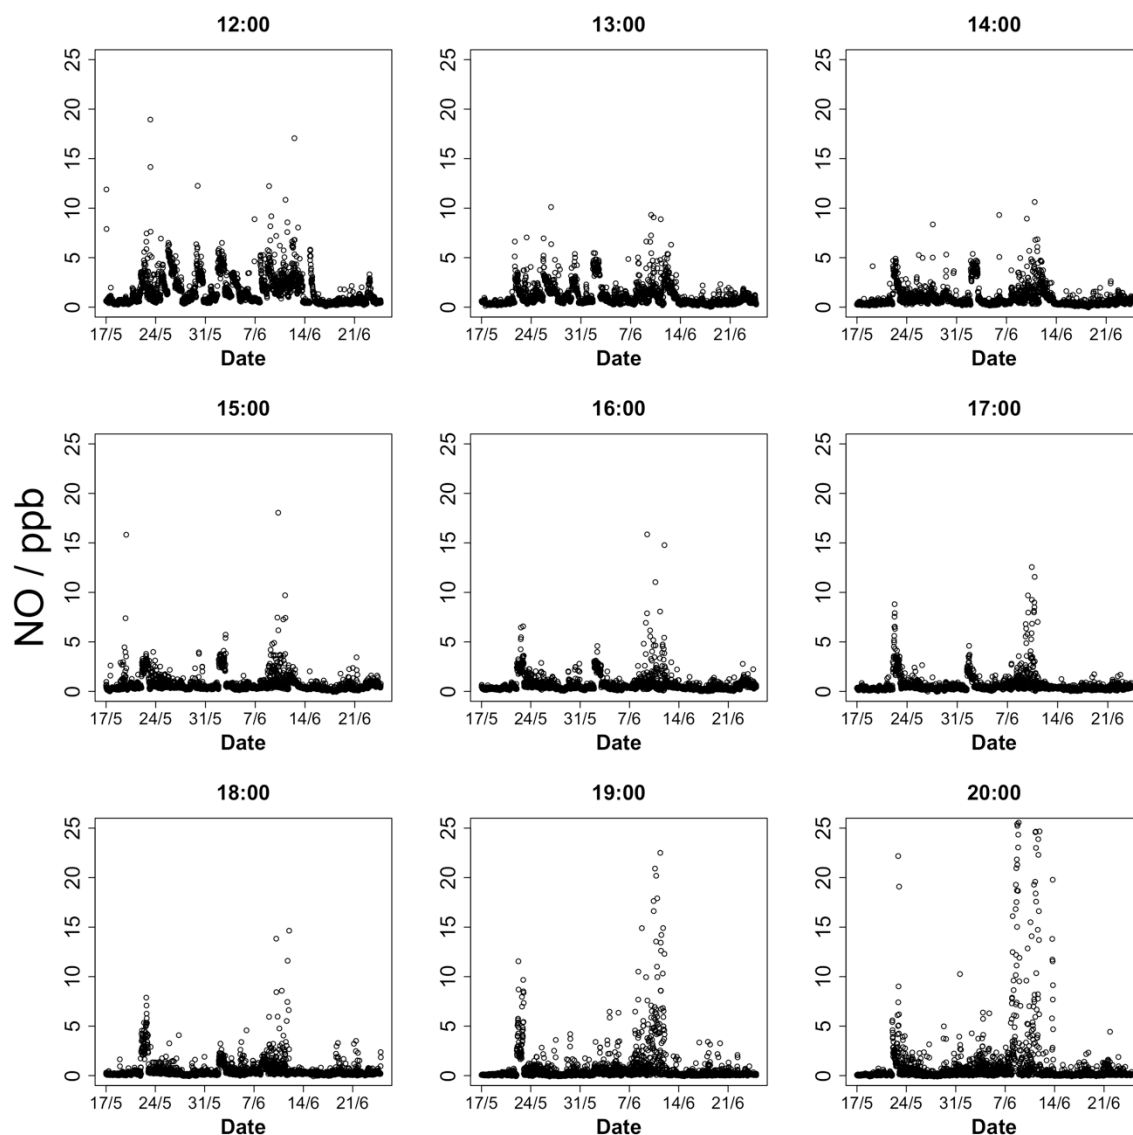

64

65 **Figure S3** NO measurements for each hour between 12:00 and 20:00 for the duration of the campaign. Measurements at 1  
66 minute frequency, i.e. 60 per day.

67

68 Figure S4 shows the mean hourly measurements of NO for each day of the campaign. A red  
69 dashed line between 12:00 and 20:00 represents the NO mixing ratio at which  $f_{NO} = 0.75$ , i.e.  
70 25 % of ISOPOO is not reacting with NO, based on the mean hourly OH and OH reactivities for  
71 the whole campaign.

72

73

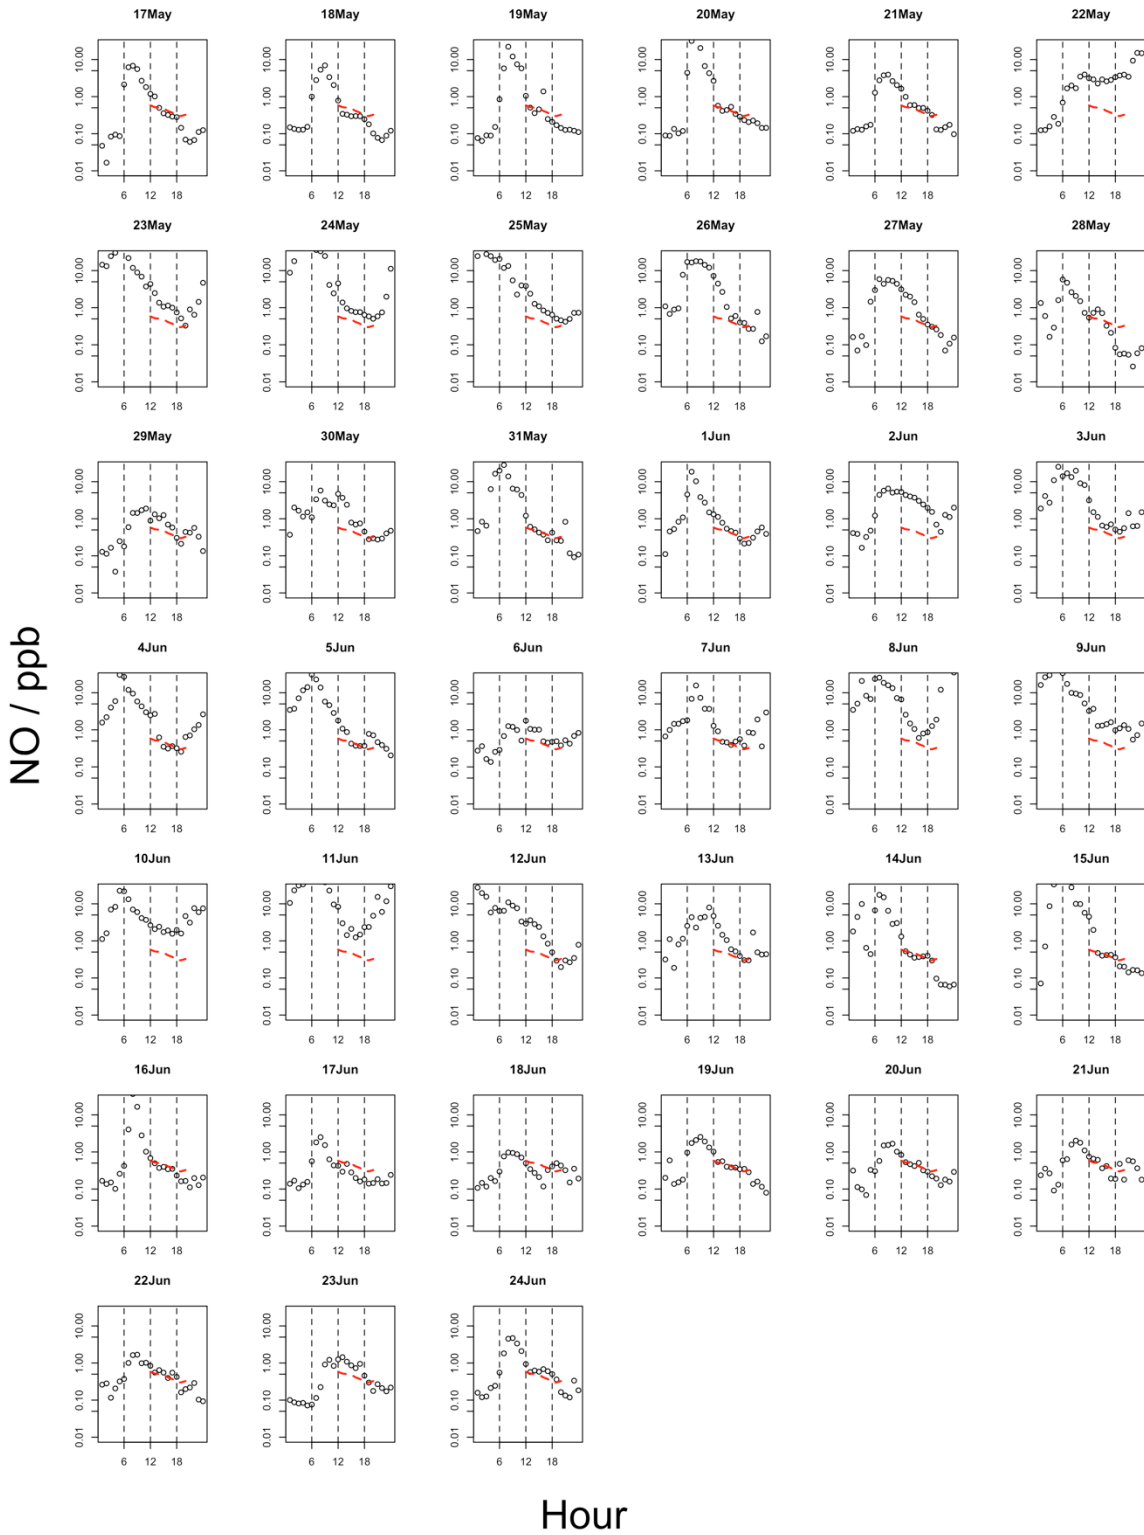

74  
75  
76

**Figure S4** Mean hourly measured NO mixing ratios (ppb) during the campaign. Red dashed line between 12:00 and 20:00 represents the NO mixing ratio at which < 75 % of RO<sub>2</sub> are calculated to be reacting with NO.

77  
78  
79  
80

81 **Figure 3 Analysis**

82

83 Figure 3 in the main manuscript plots measured values of  $[\text{OH}] \times \text{OH reactivity}^*$  against  $[\text{NO}]$   
84 between 12:00 and 20:00 for campaigns across a range of different environments. Only field  
85 campaigns where both OH and OH reactivity were measured can be plotted on Figure 3 (see  
86 Table S1) and the variability in NO levels in these regions is likely to be greater. For the Beijing  
87 dataset, the hourly median values of  $[\text{NO}]$  are used (Figure S5), with the 9 'atypical' chemistry  
88 days (as defined above) removed. Figure S5 shows the NO measurements for each hour  
89 between 12:00 and 20:00 for the whole campaign (excluding the 9 'atypical chemistry days')  
90 binned into 50 ppt bins between 0 and 1000 ppt. The median value takes into account all of  
91 the measurements including those above 1000 ppt not shown.

92

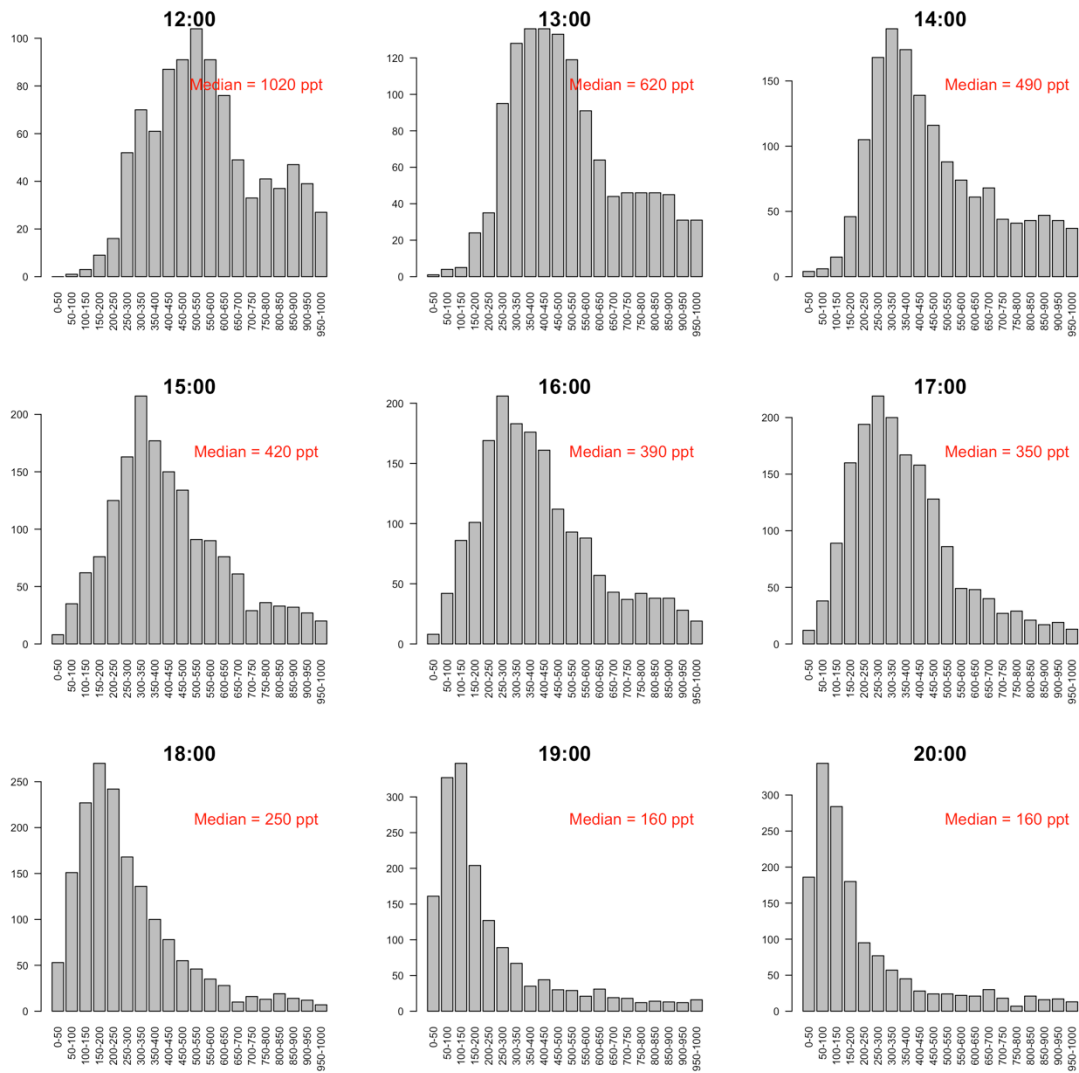

**NO / ppt**

93  
94  
95

**Figure S5** Distribution of minute averaged NO mixing ratios (ppt) during the campaign split in to 50 ppt bins for the hours 12:00 – 20:00, excluding the nine atypical days (see ‘Filtering data for diurnals’ above).

96  
97  
98  
99  
100  
101  
102  
103  
104

105 Table S1 details the location and measurement details of the NO, OH, and OH reactivity  
 106 measurements presented in Figure 3 of the main manuscript.

107

108 **Table S1** Details of measurement locations and conditions presented in Figure 3.

| Location                                                                                                     | Campaign           | Date                     | HO <sub>x</sub> and OH reactivity measurements<br>Inlet position                 | Reference                |
|--------------------------------------------------------------------------------------------------------------|--------------------|--------------------------|----------------------------------------------------------------------------------|--------------------------|
| <b>NEW YORK</b><br>Queens College,<br>Borough of Queens<br>(40° 44' 15" N,<br>73° 49' 18" W)                 | PMTACS -<br>NY2001 | June –<br>August 2001    | Co-located<br>Scaffolding Tower at 6.4 m<br>T = 279 – 308 K<br>Average RH = 55 % | Ren et al.<br>(2003)     |
| <b>BORNEO</b><br>Burkit Atur GAW<br>Station,<br>Sabah Region<br>(4° 58' N, 117° 48" E)                       | OP3 - I            | April – May<br>2008      | Co-located<br>Container roof at 5 m<br>T = 295 – 300 K                           | Whalley et al.<br>(2011) |
| <b>LONDON</b><br>Sion Manning School,<br>North Kensington<br>(51° 31' 61" N,<br>0° 12' 48" W)                | ClearfLo           | July –<br>August<br>2012 | Co-located<br>Container roof at 3.5 m<br>T = 285 – 300 K                         | Whalley et al.<br>(2016) |
| <b>ALABAMA</b><br>Centreville Research<br>Site,<br>Brent, SE – US<br>(32° 54' 11.81" N,<br>87° 14' 59.79" W) | SOAS               | June – July<br>2014      | Co-located<br>Tower at 15 m<br>T = 301 – 303 K<br>RH = 50 – 80 %                 | Sanchez et al.<br>(2018) |

109

110

111

112

## 113 Modelling approach

### 114 Box modelling

115 **Table S2** Dry deposition velocities applied to all species based on their functional groups –  
 116 based on Nguyen et al. (2015)

| Functional group /<br>species | Dry deposition velocity<br>(cm s <sup>-1</sup> ) |
|-------------------------------|--------------------------------------------------|
| Hydroperoxide                 | 2.0                                              |
| H <sub>2</sub> O <sub>2</sub> | 5.2                                              |
| Organic nitrate               | 2.0                                              |
| HNO <sub>3</sub>              | 3.8                                              |
| Organic acid                  | 1.0                                              |
| Oxygenated VOC                | 1.2                                              |
| Other                         | 0.1                                              |

117

118

119 Figure S6 shows the amount of ISOPOO reacting with NO ( $f_{\text{NO}}$ ), HO<sub>2</sub> ( $f_{\text{HO}_2}$ ), RO<sub>2</sub> ( $f_{\text{RO}_2}$ ), or  
120 isomerising ( $f_{\text{iso}}$ ), for four different model runs with different fixed concentrations of C<sub>5</sub>H<sub>8</sub> (i.e.  
121 OH reactivity) and OH. The point at which the contributions of the NO ( $f_{\text{NO}}$ ) and HO<sub>2</sub> ( $f_{\text{HO}_2}$ )  
122 channels are equal increases with increasing [OH] and with increasing OH reactivity, as shown  
123 in Figure 3 of the main manuscript. Figure S7 shows the modelled HO<sub>2</sub> and RO<sub>2</sub> concentrations  
124 for the same four model runs. As expected, both HO<sub>2</sub> and RO<sub>2</sub> increase with increasing [OH]  
125 and OH reactivity – this leads to the observed changes in  $f_{\text{NO}}$  and  $f_{\text{HO}_2}$  in Figure S6. At very low  
126 [NO] (< 20 ppt), [RO<sub>2</sub>] > [HO<sub>2</sub>], although HO<sub>2</sub> dominates the reaction of ISOPOO because  
127  $k(\text{ISOPOO} + \text{HO}_2) \gg k(\text{ISOPOO} + \text{RO}_2)$  (Jenkin et al., 2015). As [NO] increases, [RO<sub>2</sub>] falls  
128 rapidly, with [HO<sub>2</sub>] falling less rapidly and becoming greater than RO<sub>2</sub>.



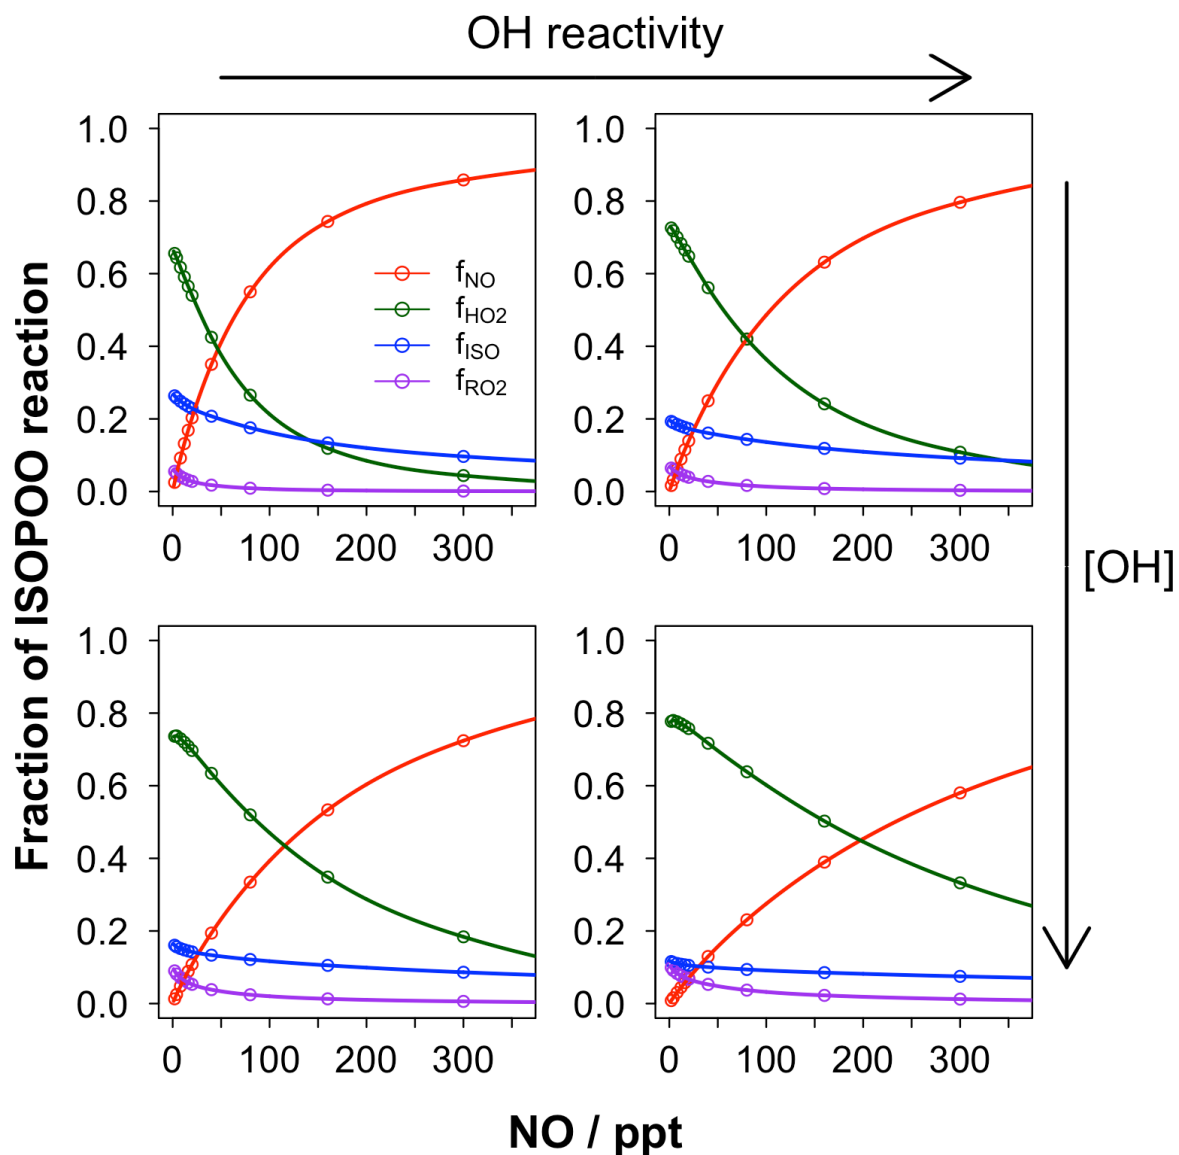

129  
 130 **Figure S6** Example of model output showing the fraction of ISOPOO reacting with NO ( $f_{NO}$ ), HO<sub>2</sub> ( $f_{HO2}$ ), RO<sub>2</sub> ( $f_{RO2}$ ), or  
 131 isomerising ( $f_{ISO}$ ), for four different model runs. Top left: [C<sub>5</sub>H<sub>8</sub>] = 1.7 ppb, [OH] =  $5 \times 10^5$  cm<sup>-3</sup>; Top right: [C<sub>5</sub>H<sub>8</sub>] = 5.0 ppb,  
 132 [OH] =  $5 \times 10^5$  cm<sup>-3</sup>; Bottom left: [C<sub>5</sub>H<sub>8</sub>] = 1.7 ppb, [OH] =  $3 \times 10^6$  cm<sup>-3</sup>; Bottom right: [C<sub>5</sub>H<sub>8</sub>] = 5.0 ppb, [OH] =  $3 \times 10^6$  cm<sup>-3</sup>

133  
 134  
 135

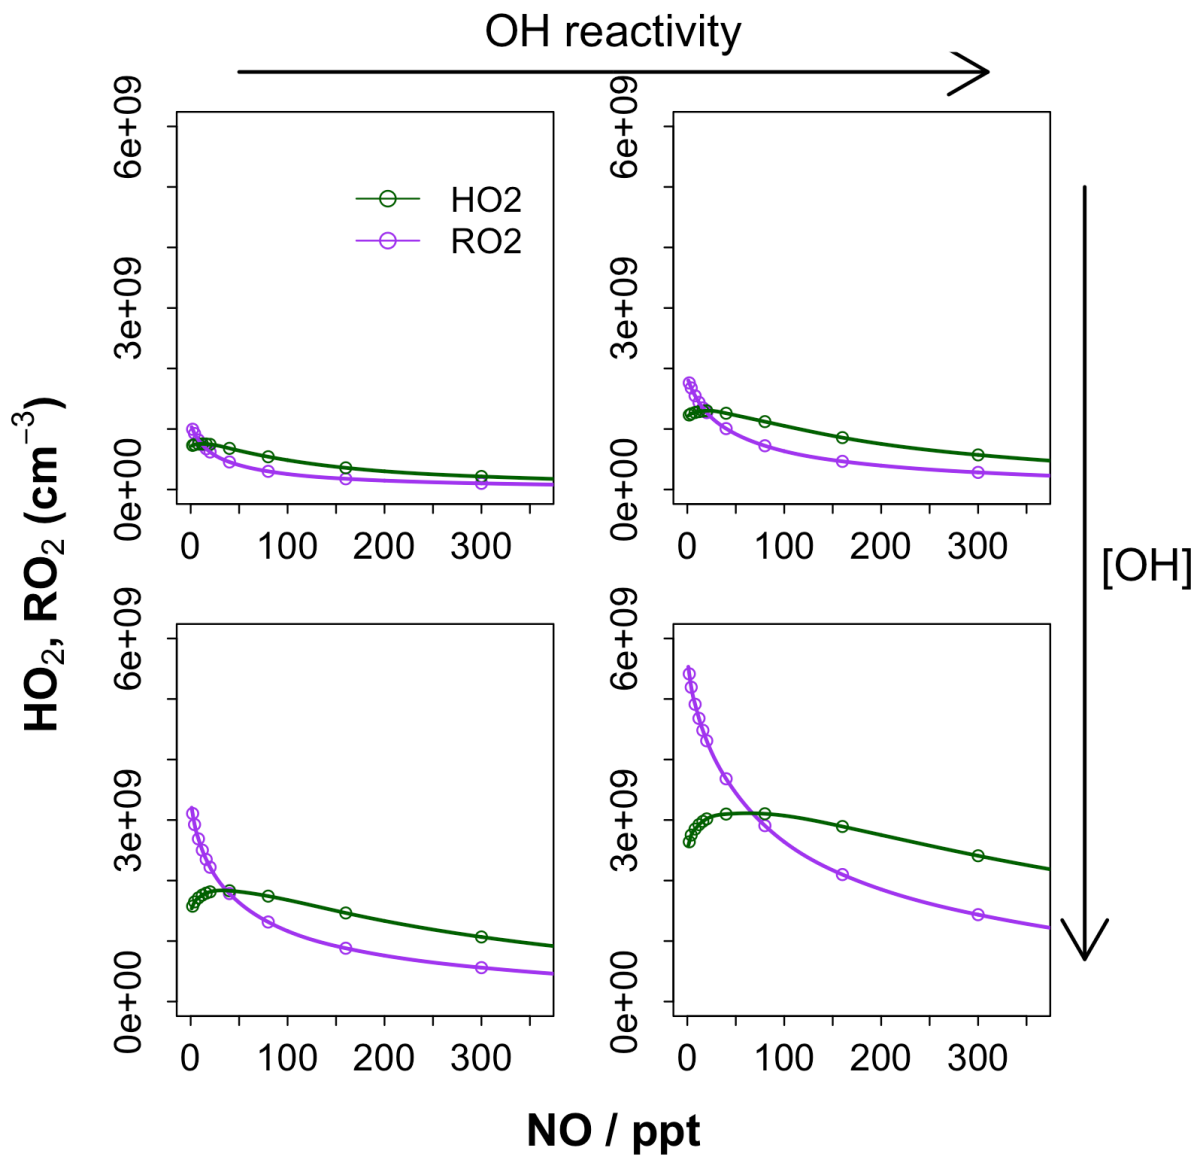

136

137 **Figure S7** Example of model output showing modelled  $[HO_2]$  and  $[RO_2]$  for the four model runs shown in Figure S6. Top left:  
 138  $[C_5H_8] = 1.7$  ppb,  $[OH] = 5 \times 10^5$   $cm^{-3}$ ; Top right:  $[C_5H_8] = 5.0$  ppb,  $[OH] = 5 \times 10^5$   $cm^{-3}$ ; Bottom left:  $[C_5H_8] = 1.7$  ppb,  $[OH] = 3$   
 139  $\times 10^6$   $cm^{-3}$ ; Bottom right:  $[C_5H_8] = 5.0$  ppb,  $[OH] = 3 \times 10^6$   $cm^{-3}$

140

141

142

143

144 **Model calculated OH reactivity**

145

146 The x-axis of Figure 3 in the main manuscript is OH x OH reactivity\*, where OH reactivity\* is  
147 defined as the OH reactivity attributable to VOCs (Equation E1) – i.e. without contributions  
148 from OH+NO<sub>x</sub> (as this reaction does not make any RO<sub>2</sub> species). The total OH reactivity as a  
149 function of [NO] from an example model run, for which [C<sub>5</sub>H<sub>8</sub>] = 3.4 ppb and [OH] = 1 x 10<sup>6</sup>  
150 cm<sup>-3</sup> is shown in Figure S8. The modelled OH reactivity is highest at low NO concentrations,  
151 with the main contributions from isoprene hydroperoxides (produced from ISOPOO+HO<sub>2</sub>) and  
152 the parent VOC isoprene. At higher NO concentrations, the reactivity first decreases as  
153 production of isoprene hydroperoxides decreases, at even higher NO concentrations, OH  
154 reactivity begins to increase again as contributions from NO and NO<sub>2</sub> become important –  
155 however these do not contribute to OH reactivity\*.

156

157

C5H8 = 3.4 ppb, OH = 1e6

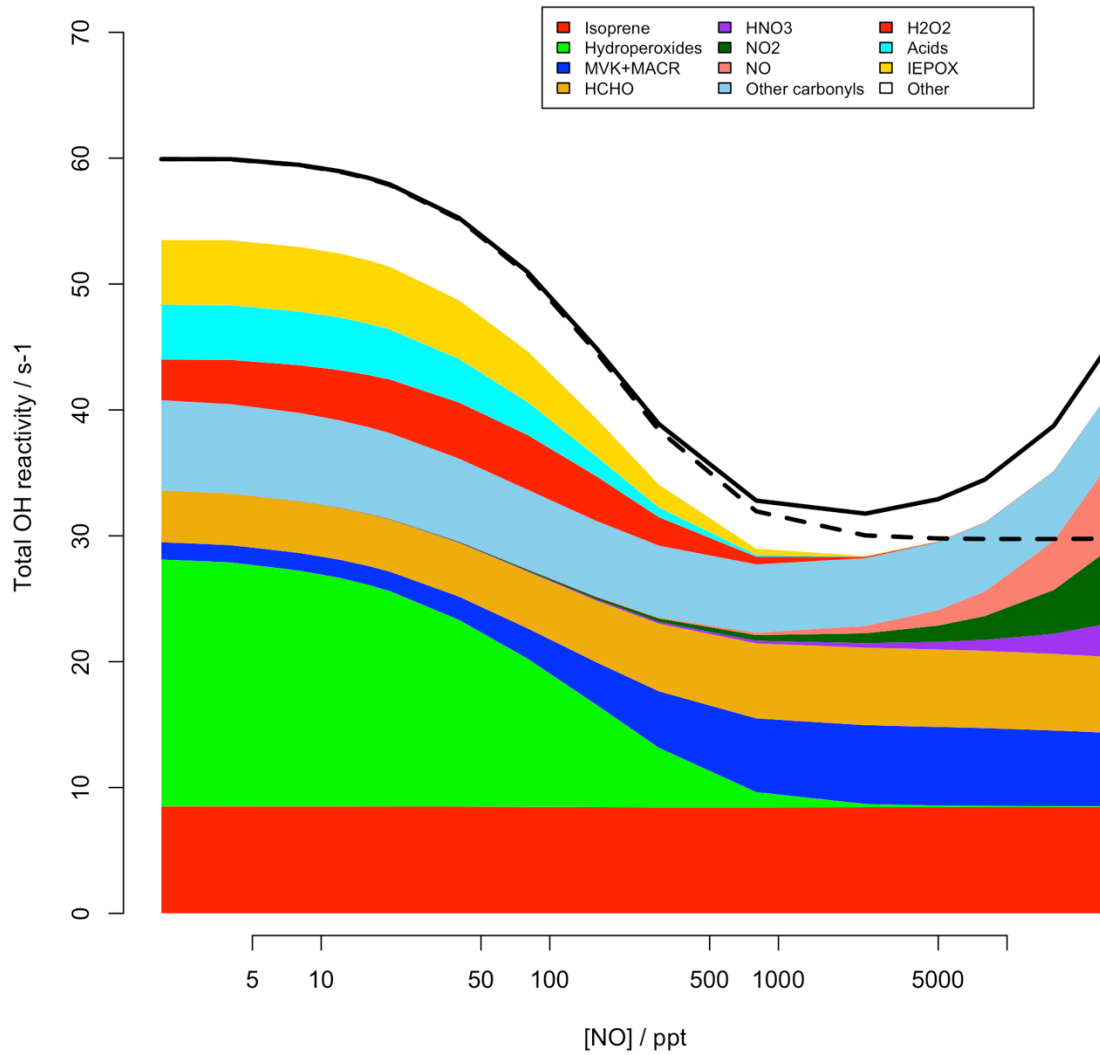

158  
159  
160

**Figure S8** Modelled OH reactivity .v. [NO] for a model run initiated with  $[C_5H_8] = 3.4$  ppbv,  $[OH] = 1 \times 10^6$  cm<sup>-3</sup>. Solid line is total OH reactivity. Dashed line is total OH reactivity\*.

161  
162  
163  
164  
165  
166  
167  
168  
169  
170  
171  
172  
173  
174

175

176 **Fraction of NO reacting with other RO<sub>2</sub>**

177

178 The box modelling for Figure 3 in the main manuscript is initialised with isoprene as the only  
179 VOC. Hence ISOPOO are the main (non-HO<sub>2</sub>) RO<sub>2</sub> and the reactivity is dependent on isoprene  
180 and its oxidation products. However, the conclusions on the fate of ISOPOO drawn from the  
181 modelling hold for any other peroxy radicals, with minor variations. The fraction of RO<sub>2</sub> from  
182 a particular VOC that reacts with NO (i.e.  $f_{NO}$ ) is dependent on the ratio of its reaction rate  
183 with NO ( $k_{NO}$ ) to the sum of all the loss processes (Equation ES1).

184

185 
$$f_{NO} = \frac{k_{NO}[NO]}{k_{NO}[NO] + k_{HO_2}[HO_2] + k_{RO_2}[RO_2] + k_{ISOM}} \quad (ES1)$$

186

187 In the MCM,  $k_{NO+RO_2}$  is the same value for the majority of RO<sub>2</sub>,  $2.7 \times 10^{-12} \exp^{(360/TEMP)} = 9.0 \times$   
188  $10^{-12}$  (298K) (with the exception of acyl-RO<sub>2</sub> for which it is  $2.0 \times 10^{-11}$  (298K) (Jenkin et al.,  
189 1997; 2019)). The other possible major sink for RO<sub>2</sub> under atmospheric conditions is reaction  
190 with HO<sub>2</sub>.  $k_{HO_2+RO_2}$  varies with carbon number in the MCM tending towards a maximum value  
191 of  $2.3 \times 10^{-11}$  (298K) (Jenkin et al., 1997)). Figure S9 shows the variation of  $f_{NO}$  as a function of  
192 [NO] for the initial RO<sub>2</sub> derived from isoprene, n-butane (a straight chain alkane), and toluene  
193 (an aromatic compound).  $f_{NO}$  follows the same trend for the RO<sub>2</sub> from all three VOCs. For both  
194 n-butane and toluene derived RO<sub>2</sub>,  $f_{NO}$  is a little higher than for ISOPOO. For the example of  
195 straight chain alkanes, as the size of the alkane increases,  $f_{NO}$  would be expected to approach  
196 closer to the values for isoprene, as  $k_{HO_2+RO_2}$  becomes faster while  $k_{NO+RO_2}$  remains the same.

197

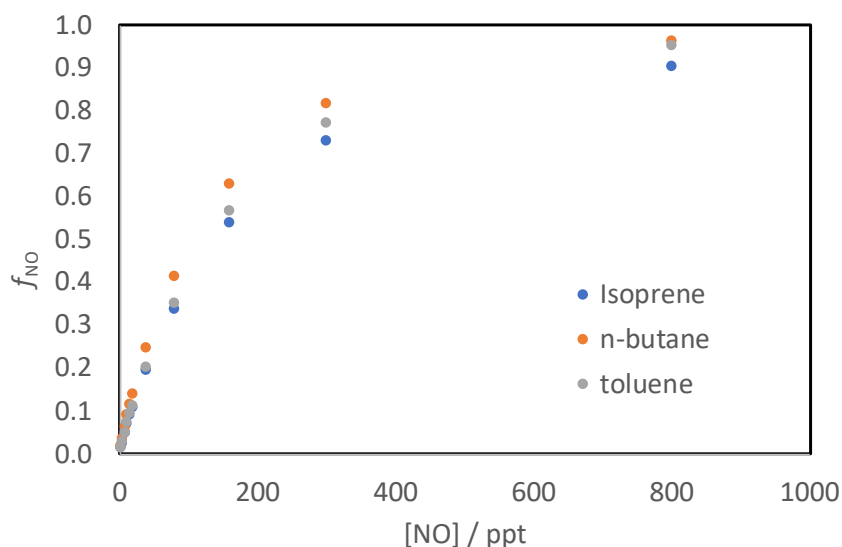

198

199 **Figure S9** Variation of  $f_{\text{NO}}$  as a function of [NO] for the peroxy radicals formed in the initial OH-oxidation step of isoprene, n-  
 200 butane and toluene.

201

## 202 **GEOS-Chem Modeling**

203

204 GEOS-Chem version 11-01 ([http://wiki.seas.harvard.edu/geos-chem/index.php/GEOS-](http://wiki.seas.harvard.edu/geos-chem/index.php/GEOS-Chem_v11-01)  
 205 [Chem\\_v11-01](http://wiki.seas.harvard.edu/geos-chem/index.php/GEOS-Chem_v11-01)) with the inclusion of the aromatic component of RACM2 (regional  
 206 atmospheric chemistry mechanism 2) was run nested at 0.25 x 0.3125 degree resolution, with  
 207 4 x 5 degree boundary conditions using GEOS-FP meteorology. The NO emissions were added  
 208 via the default MIX emission inventory, which required a 0.9x multiplier on the total daily  
 209 emissions to match observations from the APHH summer campaign. The diurnal scale factor  
 210 was considerably steeper than the default GEOS-Chem NO diurnal, with a day-time scale  
 211 factor on the order of 1.7x and a 0.25x night-time multiplier.

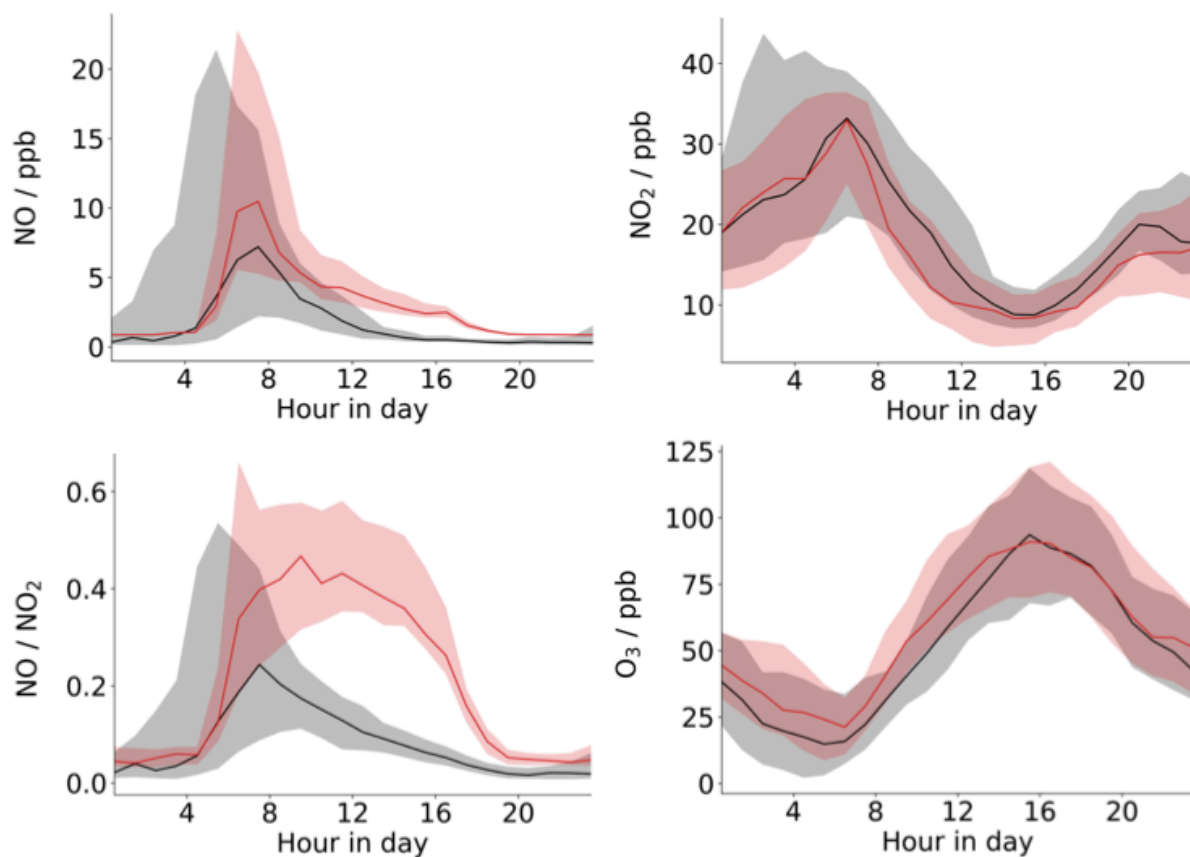

213

214 **Figure S10** GEOS-Chem model output for NO, NO<sub>2</sub>, O<sub>3</sub> and the NO/NO<sub>2</sub> ratio.

215

216 While the model is able to match the observed total NO<sub>x</sub> concentration, it cannot match the  
 217 observed [NO] or NO to NO<sub>2</sub> ratio (Figure S10). The model over predicts NO and under  
 218 predicts NO<sub>2</sub>. The model does a good job of replicating the O<sub>3</sub> concentration and observed  
 219 NO<sub>2</sub> values. As such with the chemistry currently in the model there is very little flexibility  
 220 available to appreciably change this ratio.

221

222

223

224 **References**

225

226 Parrish D. D., Xu, J., Croes, B., and Shao, M.: Air quality improvement in Los Angeles – perspectives for developing  
 227 cities, *Front. Environ. Sci. Eng.*, 10, 2016.
